# Supplementary material for: Financial Consumer Protection and the Cost of Financial Intermediation: Evidence from Advanced and Developing Economies
Source: Atypon-hosted journal article supplement (doi:10.1287/mnsc.2016.2585), 2016-12-01
Supplement: mnsc.2016.2585-sm.pdf [file mnsc.2016.2585-sm.pdf]

## Online Appendix -

### “Financial consumer protection and the cost of financial intermediation: Evidence from advanced and developing economies”

**Appendix Table A1: Change in the regulatory indices from the 2010 to the 2013 survey  
by level of development (number of countries)**

|                 | Increase | Decrease | No change | NA | Total |
|-----------------|----------|----------|-----------|----|-------|
| <b>LEGALCP</b>  |          |          |           |    |       |
| Advanced        | 10       | 10       | 2         | 4  | 26    |
| Developing      | 23       | 28       | 12        | 14 | 77    |
| <b>FREGINV</b>  |          |          |           |    |       |
| Advanced        | 9        | 0        | 14        | 3  | 26    |
| Developing      | 15       | 4        | 43        | 15 | 77    |
| <b>DISCTOT</b>  |          |          |           |    |       |
| Advanced        | 15       | 5        | 1         | 5  | 26    |
| Developing      | 26       | 19       | 2         | 30 | 77    |
| <b>FAIR</b>     |          |          |           |    |       |
| Advanced        | 5        | 5        | 12        | 4  | 26    |
| Developing      | 21       | 12       | 20        | 24 | 77    |
| <b>TDISPUTE</b> |          |          |           |    |       |
| Advanced        | 16       | 2        | 5         | 3  | 26    |
| Developing      | 22       | 15       | 26        | 14 | 77    |
| <b>TSPOWER</b>  |          |          |           |    |       |
| Advanced        | 14       | 5        | 4         | 3  | 26    |
| Developing      | 29       | 16       | 17        | 15 | 77    |

Notes: Countries were characterized as Advanced or Developing following the International Monetary Fund classification; N.A. means that information was available in one survey only.

**Appendix Table A2: Change in the regulatory indices from the 2010 to the 2013 survey  
by geographical region (number of countries)**

|                 | Increase | Decrease | No change | NA | Total |
|-----------------|----------|----------|-----------|----|-------|
| <b>LEGALCP</b>  |          |          |           |    |       |
| Africa          | 8        | 8        | 2         | 5  | 23    |
| Americas        | 4        | 10       | 4         | 1  | 19    |
| Asia            | 9        | 6        | 4         | 7  | 26    |
| Europe          | 12       | 13       | 4         | 4  | 33    |
| Oceania         | 0        | 1        | 0         | 1  | 2     |
| <b>PRUDINV</b>  |          |          |           |    |       |
| Africa          | 3        | 1        | 14        | 5  | 23    |
| Americas        | 4        | 0        | 13        | 2  | 19    |
| Asia            | 6        | 1        | 12        | 7  | 26    |
| Europe          | 10       | 2        | 18        | 3  | 33    |
| Oceania         | 1        | 0        | 0         | 1  | 2     |
| <b>DISCTOT</b>  |          |          |           |    |       |
| Africa          | 6        | 2        | 1         | 14 | 23    |
| Americas        | 10       | 6        | 0         | 3  | 19    |
| Asia            | 13       | 4        | 1         | 8  | 26    |
| Europe          | 11       | 12       | 1         | 9  | 33    |
| Oceania         | 1        | 0        | 0         | 1  | 2     |
| <b>FAIR</b>     |          |          |           |    |       |
| Africa          | 6        | 1        | 3         | 13 | 23    |
| Americas        | 4        | 3        | 10        | 2  | 19    |
| Asia            | 8        | 5        | 6         | 7  | 26    |
| Europe          | 7        | 8        | 13        | 5  | 33    |
| Oceania         | 1        | 0        | 0         | 1  | 2     |
| <b>TDISPUTE</b> |          |          |           |    |       |
| Africa          | 6        | 2        | 10        | 5  | 23    |
| Americas        | 6        | 5        | 7         | 1  | 19    |
| Asia            | 10       | 3        | 6         | 7  | 26    |
| Europe          | 15       | 7        | 8         | 3  | 33    |
| Oceania         | 1        | 0        | 0         | 1  | 2     |
| <b>TSPOWER</b>  |          |          |           |    |       |
| Africa          | 11       | 3        | 4         | 5  | 23    |
| Americas        | 5        | 6        | 7         | 1  | 19    |
| Asia            | 12       | 5        | 2         | 7  | 26    |
| Europe          | 14       | 7        | 8         | 4  | 33    |
| Oceania         | 1        | 0        | 0         | 1  | 2     |

Notes: Countries were classified in geographical regions followed the United Nations classification; N.A. means that information was available in one survey only.

### **Appendix 3 - Summary Statistics**

Appendix Table A3 provides the summary statistics on the bank-specific and country-specific variables used in this study.<sup>1</sup> I present the statistics for the whole sample, as well as for advanced and developing countries.<sup>2</sup> An average bank in the sample has a net interest margin of 4.05%, and a natural logarithm of total assets that is equal to 14.73. Banks in advanced countries are larger, and they earn considerably lower NIMs. These observations are comparable to those in previous studies in the literature.<sup>3</sup> As concerns the country-level explanatory variables, consistent with prior expectations, the average value of GDP growth and inflation are lower in advanced countries. In contrast, developing countries are characterized, on average, by lower freedom in financial services, financial depth, and institutional development. Turning to the main country-level variables, that proxy for financial consumer protection, the average score for the legal framework indicator equals 4.19, and this score is higher in advanced than in developing countries. The same holds for disclosure requirements, with the average across the entire sample being 13.98, and the index of supervisory powers in relation to monitoring and enforcement, with an average score being 5.22.

---

<sup>1</sup> All the bank-specific variables were winsorized at the 1<sup>st</sup> and 99<sup>th</sup> percentile to reduce the influence of outliers.

<sup>2</sup> I follow the classification of the IMF. So, by developing I refer to both emerging and developing economies. The t-test and the Kruskal-Wallis test in Table 1 show that the differences between the two groups are statistically significant.

<sup>3</sup> For example, Dietrich et al. (2010) report a mean NIM of 3.962 for advanced countries and 6.789 for developing countries over the period 1994 - 2008.

**Appendix Table A3 – Descriptive statistics**

|                                          | Full Sample |        |          | Advanced economies |         |          | Developing economies |        |          | Advanced vs Developing |                                 |
|------------------------------------------|-------------|--------|----------|--------------------|---------|----------|----------------------|--------|----------|------------------------|---------------------------------|
|                                          | Obs.        | Mean   | St. dev. | Obs.               | Mean    | St. dev. | Obs.                 | Mean   | St. dev. | t-test                 | Kruskal-Wallis<br>$\chi^2$ test |
| <b>Bank-specific variables</b>           |             |        |          |                    |         |          |                      |        |          |                        |                                 |
| Dependent variable                       |             |        |          |                    |         |          |                      |        |          |                        |                                 |
| NIM                                      | 10,650      | 4.050  | 3.394    | 4,416              | 2.336   | 1.778    | 6,234                | 5.264  | 3.727    | 48.452***              | 3101.945***                     |
| Control variables                        |             |        |          |                    |         |          |                      |        |          |                        |                                 |
| EXPENSES                                 | 10,650      | 65.743 | 30.208   | 4,416              | 69.248  | 29.047   | 6,234                | 63.260 | 30.765   | -10.126***             | 279.057***                      |
| SIZE                                     | 10,650      | 14.731 | 2.167    | 4,416              | 15.338  | 2.182    | 6,234                | 14.302 | 2.050    | -25.025***             | 529.601***                      |
| CAPITAL                                  | 10,650      | 12.421 | 9.195    | 4,416              | 10.475  | 8.597    | 6,234                | 13.800 | 9.355    | 18.686***              | 796.113***                      |
| NII                                      | 10,650      | 1.903  | 2.496    | 4,416              | 1.497   | 2.348    | 6,234                | 2.190  | 2.558    | 14.245***              | 613.366***                      |
| LIQUID                                   | 10,650      | 32.434 | 30.302   | 4,416              | 29.980  | 33.422   | 6,234                | 34.173 | 27.754   | 7.052***               | 431.850***                      |
| CRISK                                    | 10,650      | 1.408  | 2.606    | 4,416              | 1.036   | 2.271    | 6,234                | 1.672  | 2.790    | 12.502***              | 586.150***                      |
| <b>Country-specific variables</b>        |             |        |          |                    |         |          |                      |        |          |                        |                                 |
| Control variables                        |             |        |          |                    |         |          |                      |        |          |                        |                                 |
| GDPGR                                    | 10,650      | 3.511  | 3.074    | 4,416              | 1.515   | 1.784    | 6,234                | 4.924  | 3.012    | 67.301***              | 3549.259***                     |
| INFL                                     | 10,650      | 4.480  | 5.058    | 4,416              | 1.740   | 1.276    | 6,234                | 6.421  | 5.786    | 52.861***              | 5122.280***                     |
| CONC                                     | 10,650      | 56.886 | 17.941   | 4,416              | 60.579  | 19.205   | 6,234                | 54.271 | 16.498   | -18.152***             | 320.675***                      |
| CRGRP                                    | 10,650      | 81.650 | 51.737   | 4,416              | 119.481 | 48.497   | 6,234                | 54.852 | 34.277   | -80.577***             | 3860.287***                     |
| FINFREE                                  | 10,650      | 55.729 | 17.464   | 4,416              | 69.567  | 11.154   | 6,234                | 45.926 | 14.182   | -92.373***             | 4813.717***                     |
| CORLAW                                   | 10,650      | 3.535  | 1.125    | 4,416              | 4.677   | 0.591    | 6,234                | 2.726  | 0.580    | -1.7e+02***            | 7231.146***                     |
| Financial consumer protection indicators |             |        |          |                    |         |          |                      |        |          |                        |                                 |
| LEGALCP                                  | 10,639      | 4.187  | 2.183    | 4,416              | 5.104   | 2.035    | 6,223                | 3.536  | 2.047    | -39.017***             | 1440.738***                     |
| PRUDINV                                  | 10,650      | 0.752  | 0.432    | 4,416              | 0.791   | 0.407    | 6,234                | 0.726  | 0.446    | -2.847***              | 1.494                           |
| DISCTOT                                  | 10,639      | 13.976 | 8.109    | 4,416              | 16.135  | 7.958    | 6,223                | 12.444 | 7.863    | -23.738***             | 597.171***                      |
| FAIR                                     | 10,639      | 2.927  | 1.422    | 4,416              | 3.496   | 1.101    | 6,223                | 2.523  | 1.485    | -36.942***             | 1064.425***                     |
| TDISPUTE                                 | 10,650      | 2.267  | 1.566    | 4,416              | 2.240   | 1.300    | 6,234                | 2.286  | 1.730    | 1.450                  | 5.252**                         |
| TSPOWER                                  | 10,639      | 5.222  | 3.557    | 4,416              | 6.800   | 3.078    | 6,223                | 4.104  | 3.449    | -41.510***             | 1475.197***                     |

Notes: \*\*\*Statistically significant at the 1% level, \*\*Statistically significant at the 5% level, \*Statistically significant at the 10% level; Variables are defined in Table 1.

#### **Appendix 4 – Pearson Correlations**

Appendix Table A4 presents the Pearson correlations of the variables. Panel A presents the correlation coefficients of the bank level variables, and Panel B the ones of the country level variables. These univariate correlations suggest that banks with: lower cost to income ratios, of smaller size; better capitalized; more reliant on non-interest income; with lower liquidity and higher loan loss provisions, result in earning higher net interest margins. The coefficients in Panel B reveal that: (i) the correlation between the country-level control variables are small to moderate, the highest one being the one between CORLAW and CRGDP (0.644), (ii) the correlation between the country-level control variables and the indicators of the financial consumer protection policies are also small to moderate, the highest one being the one between and LEGALCP and FINFREE (0.445), (iii) the correlation coefficients of the financial consumer protection indicators are in the range of 0.302 (PRUDINV and TDISPUTE) to 0.697 (i.e. LEGALCP and FAIR).

**Appendix Table A4 – Correlation Coefficients**

| Panel A: Bank-level variables |          | a                 | b                 | c                 | d                | e                | f                | g     |  |  |  |  |  |  |  |
|-------------------------------|----------|-------------------|-------------------|-------------------|------------------|------------------|------------------|-------|--|--|--|--|--|--|--|
| a                             | NIM      | 1.000             |                   |                   |                  |                  |                  |       |  |  |  |  |  |  |  |
| b                             | EXPENSES | -0.030<br>(0.002) | 1.000             |                   |                  |                  |                  |       |  |  |  |  |  |  |  |
| c                             | SIZE     | -0.369<br>(0.000) | -0.329<br>(0.000) | 1.000             |                  |                  |                  |       |  |  |  |  |  |  |  |
| d                             | CAPITAL  | 0.328<br>(0.000)  | 0.108<br>(0.000)  | -0.456<br>(0.000) | 1.000            |                  |                  |       |  |  |  |  |  |  |  |
| e                             | NII      | 0.230<br>(0.000)  | 0.134<br>(0.000)  | -0.333<br>(0.000) | 0.286<br>(0.000) | 1.000            |                  |       |  |  |  |  |  |  |  |
| f                             | LIQUID   | -0.038<br>(0.000) | 0.098<br>(0.000)  | -0.163<br>(0.000) | 0.358<br>(0.000) | 0.213<br>(0.000) | 1.000            |       |  |  |  |  |  |  |  |
| g                             | CRISK    | 0.355<br>(0.000)  | 0.074<br>(0.000)  | -0.145<br>(0.000) | 0.110<br>(0.000) | 0.192<br>(0.000) | 0.064<br>(0.000) | 1.000 |  |  |  |  |  |  |  |

  

| Panel B: Country-level variables |         | a                 | b                 | c                 | d                 | e                | f                | g                | h     | i | j | k | l |
|----------------------------------|---------|-------------------|-------------------|-------------------|-------------------|------------------|------------------|------------------|-------|---|---|---|---|
| a                                | GDPGR   | 1.000             |                   |                   |                   |                  |                  |                  |       |   |   |   |   |
| b                                | INFL    | 0.230<br>(0.000)  | 1.000             |                   |                   |                  |                  |                  |       |   |   |   |   |
| c                                | CONC    | -0.163<br>(0.000) | -0.097<br>(0.000) | 1.000             |                   |                  |                  |                  |       |   |   |   |   |
| d                                | CRGDP   | -0.295<br>(0.000) | -0.392<br>(0.000) | 0.306<br>(0.000)  | 1.000             |                  |                  |                  |       |   |   |   |   |
| e                                | FINFREE | -0.444<br>(0.000) | -0.477<br>(0.000) | 0.252<br>(0.000)  | 0.500<br>(0.000)  | 1.000            |                  |                  |       |   |   |   |   |
| f                                | CORLAW  | -0.416<br>(0.000) | -0.455<br>(0.000) | 0.206<br>(0.000)  | 0.644<br>(0.000)  | 0.642<br>(0.000) | 1.000            |                  |       |   |   |   |   |
| g                                | LEGALCP | -0.309<br>(0.000) | -0.213<br>(0.000) | -0.011<br>(0.251) | 0.051<br>(0.000)  | 0.445<br>(0.000) | 0.256<br>(0.000) | 1.000            |       |   |   |   |   |
| h                                | FREGINV | -0.118<br>(0.000) | -0.053<br>(0.000) | -0.137<br>(0.000) | -0.086<br>(0.000) | 0.105<br>(0.000) | 0.001<br>(0.956) | 0.538<br>(0.000) | 1.000 |   |   |   |   |

|   |          |                   |                   |                   |                   |                  |                   |                  |                  |                  |                  |                  |       |
|---|----------|-------------------|-------------------|-------------------|-------------------|------------------|-------------------|------------------|------------------|------------------|------------------|------------------|-------|
| i | DISCTOT  | -0.266<br>(0.000) | -0.085<br>(0.000) | -0.052<br>(0.000) | 0.029<br>(0.003)  | 0.282<br>(0.000) | 0.071<br>(0.000)  | 0.544<br>(0.000) | 0.504<br>(0.000) | 1.000            |                  |                  |       |
| j | FAIR     | -0.342<br>(0.000) | -0.202<br>(0.000) | -0.041<br>(0.000) | 0.135<br>(0.000)  | 0.451<br>(0.000) | 0.215<br>(0.000)  | 0.697<br>(0.000) | 0.491<br>(0.000) | 0.677<br>(0.000) | 1.000            |                  |       |
| k | TDISPUTE | -0.104<br>(0.000) | 0.038<br>(0.000)  | -0.001<br>(0.883) | -0.016<br>(0.093) | 0.190<br>(0.000) | -0.128<br>(0.000) | 0.348<br>(0.000) | 0.302<br>(0.000) | 0.598<br>(0.000) | 0.553<br>(0.000) | 1.000            |       |
| l | TSPOWER  | -0.255<br>(0.000) | -0.154<br>(0.000) | 0.012<br>(0.233)  | 0.200<br>(0.000)  | 0.342<br>(0.000) | 0.264<br>(0.000)  | 0.480<br>(0.000) | 0.457<br>(0.000) | 0.509<br>(0.000) | 0.653<br>(0.000) | 0.511<br>(0.000) | 1.000 |

Notes: p-values in parentheses; Variables are defined in Table 1.

## Appendix Table A5: Construction of Overall Consumer Protection indicator with PCA

In this Table I re-estimated the models of Tables 2 to 4, while replacing the six regulatory indicators by an overall indicator obtained through principal component analysis (PCA). Random effects model with errors clustered at the bank level. (The results do not change when the model is estimated with fixed effects, in unreported regressions); \*\*\*Statistically significant at the 1% level, \*\*Statistically significant at the 5% level, \*Statistically significant at the 10% level; p-values in parentheses; Variables are defined in Table 1

|               | All countries        | Advanced             | Developing           |
|---------------|----------------------|----------------------|----------------------|
| EXPENSES      | -0.020***<br>(0.000) | -0.010***<br>(0.000) | -0.027***<br>(0.000) |
| SIZE          | -0.380***<br>(0.000) | -0.139***<br>(0.001) | -0.546***<br>(0.000) |
| CAPITAL       | 0.070***<br>(0.000)  | 0.051***<br>(0.000)  | 0.081***<br>(0.000)  |
| NII           | -0.095***<br>(0.005) | -0.179<br>(0.112)    | -0.070***<br>(0.002) |
| LIQUID        | -0.007***<br>(0.000) | -0.007***<br>(0.000) | -0.008***<br>(0.000) |
| CRISK         | 0.120***<br>(0.000)  | 0.060***<br>(0.000)  | 0.149***<br>(0.000)  |
| GDPGR         | -0.005<br>(0.470)    | 0.014<br>(0.159)     | -0.019**<br>(0.037)  |
| INFL          | 0.041***<br>(0.000)  | 0.057***<br>(0.000)  | 0.034***<br>(0.000)  |
| CONC          | 0.008***<br>(0.004)  | -0.010***<br>(0.001) | 0.011***<br>(0.004)  |
| CRGDP         | -0.016***<br>(0.000) | -0.008***<br>(0.000) | -0.022***<br>(0.000) |
| FINFREE       | 0.001<br>(0.753)     | 0.028***<br>(0.000)  | -0.005<br>(0.315)    |
| CORLAW        | -0.546***<br>(0.000) | -0.133**<br>(0.034)  | -0.627***<br>(0.000) |
| PCA Indicator | 0.027***<br>(0.004)  | -0.043***<br>(0.001) | 0.053***<br>(0.000)  |
| Constant      | 12.812***<br>(0.000) | 5.141***<br>(0.000)  | 16.223***<br>(0.000) |
| R-sq. overall | 0.412                | 0.263                | 0.344                |
| Obs.          | 10,639               | 4,416                | 6,223                |
| Banks         | 3,013                | 1,250                | 1,763                |
| Countries     | 102                  | 26                   | 76                   |

## Appendix Table A6 - Regressions with Country dummies

In this Table I re-estimated the models of Tables 2 to 4, while including country dummies. Random effects model with errors clustered at the bank level. All the models include a constant and the following control variables which are not presented to conserve space: EXPENSES, SIZE, CAPITAL, NII, LIQUID, CRISK, GDPGR, INFL, CONC, CRGDP, FINFREE, CORLAW; \*\*\* Statistically significant at the 1% level, \*\*Statistically significant at the 5% level, \*Statistically significant at the 10% level; p-values in parentheses; Variables are defined in Table 1

|                                                     | (1)                 | (2)               | (3)                  | (4)                | (5)                  | (6)                 |
|-----------------------------------------------------|---------------------|-------------------|----------------------|--------------------|----------------------|---------------------|
| <b>Panel A: Advanced &amp; Developing countries</b> |                     |                   |                      |                    |                      |                     |
| LEGALCP                                             | 0.035***<br>(0.001) |                   |                      |                    |                      |                     |
| FREGINV                                             |                     | 0.060*<br>(0.093) |                      |                    |                      |                     |
| DISCTOT                                             |                     |                   | -0.003*<br>(0.072)   |                    |                      |                     |
| FAIR                                                |                     |                   |                      | 0.021<br>(0.176)   |                      |                     |
| TDISPUTE                                            |                     |                   |                      |                    | 0.025**<br>(0.024)   |                     |
| TSPOWER                                             |                     |                   |                      |                    |                      | 0.001<br>(0.891)    |
| Country dummies                                     | YES                 | YES               | YES                  | YES                | YES                  | YES                 |
| R-sq. overall                                       | 0.549               | 0.549             | 0.549                | 0.549              | 0.549                | 0.549               |
| Obs                                                 | 10,639              | 10,650            | 10,639               | 10,639             | 10,650               | 10,639              |
| Banks                                               | 3,013               | 3,016             | 3,013                | 3,013              | 3,016                | 3,013               |
| Countries                                           | 102                 | 103               | 102                  | 102                | 103                  | 102                 |
| <b>Panel B: Advanced countries</b>                  |                     |                   |                      |                    |                      |                     |
| LEGALCP                                             | 0.025*<br>(0.079)   |                   |                      |                    |                      |                     |
| FREGINV                                             |                     | -0.034<br>(0.512) |                      |                    |                      |                     |
| DISCTOT                                             |                     |                   | -0.008***<br>(0.000) |                    |                      |                     |
| FAIR                                                |                     |                   |                      | -0.045*<br>(0.066) |                      |                     |
| TDISPUTE                                            |                     |                   |                      |                    | -0.031***<br>(0.001) |                     |
| TSPOWER                                             |                     |                   |                      |                    |                      | -0.013**<br>(0.033) |
| Country dummies                                     | YES                 | YES               | YES                  | YES                | YES                  | YES                 |
| R-sq. overall                                       | 0.354               | 0.354             | 0.354                | 0.354              | 0.354                | 0.354               |
| Obs                                                 | 4,416               | 4,416             | 4,416                | 4,416              | 4,416                | 4,416               |
| Banks                                               | 1,250               | 1,250             | 1,250                | 1,250              | 1,250                | 1,250               |
| Countries                                           | 26                  | 26                | 26                   | 26                 | 26                   | 26                  |

---

**Panel C: Developing countries**

---

|          |                     |                     |                  |                     |                     |                   |
|----------|---------------------|---------------------|------------------|---------------------|---------------------|-------------------|
| LEGALCP  | 0.042***<br>(0.003) |                     |                  |                     |                     |                   |
| FREGINV  |                     | 0.152***<br>(0.001) |                  |                     |                     |                   |
| DISCTOT  |                     |                     | 0.002<br>(0.519) |                     |                     |                   |
| FAIR     |                     |                     |                  | 0.053***<br>(0.009) |                     |                   |
| TDISPUTE |                     |                     |                  |                     | 0.075***<br>(0.000) |                   |
| TSPOWER  |                     |                     |                  |                     |                     | 0.016*<br>(0.057) |

---

| Country<br>dummies | YES   | YES   | YES   | YES   | YES   | YES   |
|--------------------|-------|-------|-------|-------|-------|-------|
| R-sq. overall      | 0.479 | 0.479 | 0.479 | 0.479 | 0.479 | 0.479 |
| Obs                | 6,223 | 6,234 | 6,223 | 6,223 | 6,234 | 6,223 |
| Banks              | 1,763 | 1,766 | 1,763 | 1,763 | 1,766 | 1,763 |
| Countries          | 76    | 77    | 76    | 76    | 77    | 76    |

---

## Appendix Table A7 - Regressions with dummies for common Global Ultimate Owner

In this Table I re-estimated the models of Tables 2 to 4, while including dummy variables that group together banks belonging to the same Global Ultimate Owner (e.g. all banks controlled by Barclays Plc, all banks controlled by Citigroup Inc., etc.). Random effects model with errors clustered at the bank level. All the models include a constant and the following control variables which are not presented to conserve space: EXPENSES, SIZE, CAPITAL, NII, LIQUID, CRISK, GDPGR, INFL, CONC, CRGDP, FINFREE, CORLAW; \*\*\*Statistically significant at the 1% level, \*\*Statistically significant at the 5% level, \*Statistically significant at the 10% level; p-values in parentheses; Variables are defined in Table 1

|                                                     | (1)                 | (2)                 | (3)                  | (4)                  | (5)                  | (6)                  |
|-----------------------------------------------------|---------------------|---------------------|----------------------|----------------------|----------------------|----------------------|
| <b>Panel A: Advanced &amp; Developing countries</b> |                     |                     |                      |                      |                      |                      |
| LEGALCP                                             | 0.042***<br>(0.000) |                     |                      |                      |                      |                      |
| FREGINV                                             |                     | 0.133***<br>(0.000) |                      |                      |                      |                      |
| DISCTOT                                             |                     |                     | -0.003*<br>(0.068)   |                      |                      |                      |
| FAIR                                                |                     |                     |                      | 0.032**<br>(0.034)   |                      |                      |
| TDISPUTE                                            |                     |                     |                      |                      | 0.039***<br>(0.001)  |                      |
| TSPOWER                                             |                     |                     |                      |                      |                      | 0.003<br>(0.597)     |
| Dummies for Common                                  |                     |                     |                      |                      |                      |                      |
| GUO                                                 | YES                 | YES                 | YES                  | YES                  | YES                  | YES                  |
| R-sq. overall                                       | 0.509               | 0.510               | 0.509                | 0.509                | 0.509                | 0.508                |
| Obs                                                 | 10,639              | 10,650              | 10,639               | 10,639               | 10,650               | 10,639               |
| Banks                                               | 3,013               | 3,016               | 3,013                | 3,013                | 3,016                | 3,013                |
| Countries                                           | 102                 | 103                 | 102                  | 102                  | 103                  | 102                  |
| <b>Panel B: Advanced countries</b>                  |                     |                     |                      |                      |                      |                      |
| LEGALCP                                             | 0.006<br>(0.660)    |                     |                      |                      |                      |                      |
| FREGINV                                             |                     | -0.094**<br>(0.050) |                      |                      |                      |                      |
| DISCTOT                                             |                     |                     | -0.009***<br>(0.000) |                      |                      |                      |
| FAIR                                                |                     |                     |                      | -0.068***<br>(0.001) |                      |                      |
| TDISPUTE                                            |                     |                     |                      |                      | -0.031***<br>(0.003) |                      |
| TSPOWER                                             |                     |                     |                      |                      |                      | -0.021***<br>(0.001) |
| Dummies for Common                                  |                     |                     |                      |                      |                      |                      |
|                                                     | YES                 | YES                 | YES                  | YES                  | YES                  | YES                  |

|               |       |       |       |       |       |       |
|---------------|-------|-------|-------|-------|-------|-------|
| GUO           |       |       |       |       |       |       |
| R-sq. overall | 0.393 | 0.395 | 0.395 | 0.398 | 0.393 | 0.397 |
| Obs           | 4,416 | 4,416 | 4,416 | 4,416 | 4,416 | 4,416 |
| Banks         | 1,250 | 1,250 | 1,250 | 1,250 | 1,250 | 1,250 |
| Countries     | 26    | 26    | 26    | 26    | 26    | 26    |

**Panel C: Developing countries**

|          |                     |                     |                  |                     |                     |                   |
|----------|---------------------|---------------------|------------------|---------------------|---------------------|-------------------|
| LEGALCP  | 0.050***<br>(0.000) |                     |                  |                     |                     |                   |
| FREGINV  |                     | 0.252***<br>(0.000) |                  |                     |                     |                   |
| DISCTOT  |                     |                     | 0.002<br>(0.512) |                     |                     |                   |
| FAIR     |                     |                     |                  | 0.061***<br>(0.001) |                     |                   |
| TDISPUTE |                     |                     |                  |                     | 0.082***<br>(0.000) |                   |
| TSPOWER  |                     |                     |                  |                     |                     | 0.015*<br>(0.056) |

|                    |       |       |       |       |       |       |
|--------------------|-------|-------|-------|-------|-------|-------|
| Dummies for Common |       |       |       |       |       |       |
| GUO                | YES   | YES   | YES   | YES   | YES   | YES   |
| R-sq. overall      | 0.463 | 0.465 | 0.463 | 0.463 | 0.462 | 0.462 |
| Obs                | 6,223 | 6,234 | 6,223 | 6,223 | 6,234 | 6,223 |
| Banks              | 1,763 | 1,766 | 1,763 | 1,763 | 1,766 | 1,763 |
| Countries          | 76    | 77    | 76    | 76    | 77    | 76    |

## Appendix Table A8 - Regressions with Data from 2010 and 2013 only

In this Table I re-estimated the models of Tables 2 to 4, using data from 2010 and 2013, only. Also, for countries for which there is information in one survey only, I include only this year in the regressions. Random effects model with errors clustered at the bank level. All the models include a constant and the following control variables which are not presented to conserve space: EXPENSES, SIZE, CAPITAL, NII, LIQUID, CRISK, GDPGR, INFL, CONC, CRGDP, FINFREE, CORLAW; \*\*\*Statistically significant at the 1% level, \*\*Statistically significant at the 5% level, \*Statistically significant at the 10% level; p-values in parentheses; Variables are defined in Table 1

|                                                     | (1)                 | (2)                | (3)                 | (4)                 | (5)                | (6)                |
|-----------------------------------------------------|---------------------|--------------------|---------------------|---------------------|--------------------|--------------------|
| <b>Panel A: Advanced &amp; Developing countries</b> |                     |                    |                     |                     |                    |                    |
| LEGALCP                                             | 0.039***<br>(0.006) |                    |                     |                     |                    |                    |
| FREGINV                                             |                     | 0.165**<br>(0.001) |                     |                     |                    |                    |
| DISCTOT                                             |                     |                    | -0.003<br>(0.377)   |                     |                    |                    |
| FAIR                                                |                     |                    |                     | 0.056**<br>(0.020)  |                    |                    |
| TDISPUTE                                            |                     |                    |                     |                     | 0.046**<br>(0.014) |                    |
| TSPOWER                                             |                     |                    |                     |                     |                    | -0.007<br>(0.404)  |
| R-sq. overall                                       | 0.447               | 0.442              | 0.447               | 0.452               | 0.444              | 0.442              |
| Obs                                                 | 4,943               | 4,946              | 4,661               | 4,831               | 4,957              | 4,954              |
| Banks                                               | 2,901               | 2,903              | 2,872               | 2,888               | 2,904              | 2,901              |
| Countries                                           | 102                 | 103                | 102                 | 102                 | 103                | 102                |
| <b>Panel B: Advanced countries</b>                  |                     |                    |                     |                     |                    |                    |
| LEGALCP                                             | 0.040**<br>(0.028)  |                    |                     |                     |                    |                    |
| FREGINV                                             |                     | -0.037<br>(0.595)  |                     |                     |                    |                    |
| DISCTOT                                             |                     |                    | -0.011**<br>(0.034) |                     |                    |                    |
| FAIR                                                |                     |                    |                     | -0.065**<br>(0.031) |                    |                    |
| TDISPUTE                                            |                     |                    |                     |                     | -0.058*<br>(0.068) |                    |
| TSPOWER                                             |                     |                    |                     |                     |                    | -0.028*<br>(0.055) |
| R-sq. overall                                       | 0.303               | 0.292              | 0.292               | 0.290               | 0.293              | 0.294              |
| Obs                                                 | 2,082               | 2,093              | 2,078               | 2,087               | 2,093              | 2,093              |
| Banks                                               | 1,196               | 1,196              | 1,194               | 1,195               | 1,196              | 1,196              |
| Countries                                           | 26                  | 26                 | 26                  | 26                  | 26                 | 26                 |
| <b>Panel C: Developing countries</b>                |                     |                    |                     |                     |                    |                    |
| LEGALCP                                             | 0.033*<br>(0.084)   |                    |                     |                     |                    |                    |

|               |       |          |         |          |          |         |
|---------------|-------|----------|---------|----------|----------|---------|
| FREGINV       |       | 0.316*** |         |          |          |         |
|               |       | (0.000)  |         |          |          |         |
| DISCTOT       |       |          | -0.001  |          |          |         |
|               |       |          | (0.824) |          |          |         |
| FAIR          |       |          |         | 0.095*** |          |         |
|               |       |          |         | (0.002)  |          |         |
| TDISPUTE      |       |          |         |          | 0.090*** |         |
|               |       |          |         |          | (0.000)  |         |
| TSPOWER       |       |          |         |          |          | -0.003  |
|               |       |          |         |          |          | (0.796) |
| <hr/>         |       |          |         |          |          |         |
| R-sq. overall | 0.391 | 0.389    | 0.404   | 0.406    | 0.393    | 0.392   |
| Obs           | 2,861 | 2,853    | 2,583   | 2,744    | 2,864    | 2,861   |
| Banks         | 1,705 | 1,707    | 1,678   | 1,693    | 1,708    | 1,705   |
| Countries     | 76    | 76       | 76      | 76       | 76       | 76      |
| <hr/>         |       |          |         |          |          |         |

## Appendix Table A9 - Regressions with Bank Fixed Effects

This Table shows the results of a model with bank fixed effects and errors clustered at the bank level. All the models include a constant and the following control variables which are not presented to conserve space: EXPENSES, SIZE, CAPITAL, NII, LIQUID, CRISK, GDPGR, INFL, CONC, CRGDP, FINFREE, CORLAW; \*\*\*Statistically significant at the 1% level, \*\*Statistically significant at the 5% level, \*Statistically significant at the 10% level; p-values in parentheses; Variables are defined in Table 1.

|                                                   | (1)                 | (2)                 | (3)                  | (4)                | (5)                  | (6)                |
|---------------------------------------------------|---------------------|---------------------|----------------------|--------------------|----------------------|--------------------|
| <b>Panel A: Advanced and Developing countries</b> |                     |                     |                      |                    |                      |                    |
| LEGALCP                                           | 0.040***<br>(0.000) |                     |                      |                    |                      |                    |
| FREGINV                                           |                     | 0.092**<br>(0.027)  |                      |                    |                      |                    |
| DISCTOT                                           |                     |                     | -0.002<br>(0.378)    |                    |                      |                    |
| FAIR                                              |                     |                     |                      | 0.030*<br>(0.080)  |                      |                    |
| TDISPUTE                                          |                     |                     |                      |                    | 0.031**<br>(0.013)   |                    |
| TSPOWER                                           |                     |                     |                      |                    |                      | 0.006<br>(0.402)   |
| R-sq. overall                                     | 0.314               | 0.314               | 0.312                | 0.311              | 0.309                | 0.312              |
| Obs                                               | 10,639              | 10,650              | 10,639               | 10,639             | 10,650               | 10,639             |
| Banks                                             | 3,013               | 3,016               | 3,013                | 3,013              | 3,016                | 3,013              |
| Countries                                         | 102                 | 103                 | 102                  | 102                | 103                  | 102                |
| <b>Panel B: Advanced countries</b>                |                     |                     |                      |                    |                      |                    |
| LEGALCP                                           | 0.022<br>(0.113)    |                     |                      |                    |                      |                    |
| FREGINV                                           |                     | -0.028<br>(0.616)   |                      |                    |                      |                    |
| DISCTOT                                           |                     |                     | -0.008***<br>(0.000) |                    |                      |                    |
| FAIR                                              |                     |                     |                      | -0.042*<br>(0.080) |                      |                    |
| TDISPUTE                                          |                     |                     |                      |                    | -0.031***<br>(0.001) |                    |
| TSPOWER                                           |                     |                     |                      |                    |                      | -0.011*<br>(0.081) |
| R-sq. overall                                     | 0.122               | 0.123               | 0.120                | 0.128              | 0.123                | 0.125              |
| Obs.                                              | 4,416               | 4,416               | 4,416                | 4,416              | 4,416                | 4,416              |
| Banks                                             | 1,250               | 1,250               | 1,250                | 1,250              | 1,250                | 1,250              |
| Countries                                         | 26                  | 26                  | 26                   | 26                 | 26                   | 26                 |
| <b>Panel C: Developing countries</b>              |                     |                     |                      |                    |                      |                    |
| LEGALCP                                           | 0.049***<br>(0.001) |                     |                      |                    |                      |                    |
| FREGINV                                           |                     | 0.188***<br>(0.001) |                      |                    |                      |                    |

|               |       |       |                  |                     |                     |                    |
|---------------|-------|-------|------------------|---------------------|---------------------|--------------------|
| DISCTOT       |       |       | 0.004<br>(0.322) |                     |                     |                    |
| FAIR          |       |       |                  | 0.060***<br>(0.010) |                     |                    |
| TDISPUTE      |       |       |                  |                     | 0.084***<br>(0.000) |                    |
| TSPOWER       |       |       |                  |                     |                     | 0.022**<br>(0.031) |
| R-sq. overall | 0.273 | 0.279 | 0.274            | 0.276               | 0.279               | 0.274              |
| Obs.          | 6,223 | 6,234 | 6,223            | 6,223               | 6,234               | 6,223              |
| Banks         | 1,763 | 1,766 | 1,763            | 1,763               | 1,766               | 1,763              |
| Countries     | 76    | 77    | 76               | 76                  | 77                  | 76                 |

### Appendix Table A10 – Regression Results: Full Sample and Sub-indices

This Table presents the results for the full sample, while using the regulatory sub-indices. Random effects model with errors clustered at the bank level. All the models include a constant and the following control variables which are not presented to conserve space: EXPENSES, SIZE, CAPITAL, NII, LIQUID, CRISK, GDPGR, INFL, CONC, CRGDP, FINFREE, CORLAW; \*\*\*Statistically significant at the 1% level, \*\*Statistically significant at the 5% level, \*Statistically significant at the 10% level; p-values in parentheses; Variables are defined in Table 1

|             | (1)                 | (2)                 | (3)              | (4)                  | (5)                 | (6)                | (7)              | (8)              | (9)               | (10)             | (11)             | (12)                | (13)               | (14) |
|-------------|---------------------|---------------------|------------------|----------------------|---------------------|--------------------|------------------|------------------|-------------------|------------------|------------------|---------------------|--------------------|------|
| LEGALCP2    | 0.089***<br>(0.000) |                     |                  |                      |                     |                    |                  |                  |                   |                  |                  |                     |                    |      |
| FREGUNIT_NO |                     | 0.134**<br>(0.012)  |                  |                      |                     |                    |                  |                  |                   |                  |                  |                     |                    |      |
| FREGUNIT    |                     | 0.131***<br>(0.000) |                  |                      |                     |                    |                  |                  |                   |                  |                  |                     |                    |      |
| DISCOPEN    |                     |                     | 0.002<br>(0.649) |                      |                     |                    |                  |                  |                   |                  |                  |                     |                    |      |
| DISCPERIOD  |                     |                     |                  | -0.010***<br>(0.003) |                     |                    |                  |                  |                   |                  |                  |                     |                    |      |
| COMPLAINTS  |                     |                     |                  |                      | 0.043***<br>(0.000) |                    |                  |                  |                   |                  |                  |                     |                    |      |
| THIRD       |                     |                     |                  |                      |                     | 0.077**<br>(0.024) |                  |                  |                   |                  |                  |                     |                    |      |
| MONITOR     |                     |                     |                  |                      |                     |                    | 0.005<br>(0.598) |                  |                   |                  |                  |                     |                    |      |
| ENFPOWER    |                     |                     |                  |                      |                     |                    |                  | 0.008<br>(0.435) |                   |                  |                  |                     |                    |      |
| GOPEN       |                     |                     |                  |                      |                     |                    |                  |                  | -0.003<br>(0.734) |                  |                  |                     |                    |      |
| DEPOPEN     |                     |                     |                  |                      |                     |                    |                  |                  |                   | 0.008<br>(0.333) |                  |                     |                    |      |
| CROPEN      |                     |                     |                  |                      |                     |                    |                  |                  |                   |                  | 0.003<br>(0.692) |                     |                    |      |
| GPERIOD     |                     |                     |                  |                      |                     |                    |                  |                  |                   |                  |                  | -0.069**<br>(0.038) |                    |      |
| DEPERIOD    |                     |                     |                  |                      |                     |                    |                  |                  |                   |                  |                  |                     | -0.018*<br>(0.073) |      |

| CRPERIOD      |        |        |        |        |        |        |        |        |        |        |        |        |        |        | -0.017**<br>(0.002) |
|---------------|--------|--------|--------|--------|--------|--------|--------|--------|--------|--------|--------|--------|--------|--------|---------------------|
| R-sq. overall | 0.412  | 0.413  | 0.411  | 0.412  | 0.412  | 0.411  | 0.411  | 0.411  | 0.411  | 0.411  | 0.411  | 0.412  | 0.411  | 0.412  |                     |
| Obs.          | 10,639 | 10,650 | 10,639 | 10,639 | 10,650 | 10,650 | 10,639 | 10,639 | 10,639 | 10,639 | 10,639 | 10,639 | 10,639 | 10,639 |                     |
| Banks         | 3,013  | 3,016  | 3,013  | 3,013  | 3,016  | 3,016  | 3,013  | 3,013  | 3,013  | 3,013  | 3,013  | 3,013  | 3,013  | 3,013  |                     |
| Countries     | 102    | 103    | 102    | 102    | 103    | 103    | 102    | 102    | 102    | 102    | 102    | 102    | 102    | 102    |                     |

### Appendix Table A11 – Regression Results: Advanced economies and Sub-indices

This Table presents the results for the sample of advanced countries, while using the regulatory sub-indices. Random effects model with errors clustered at the bank level. All the models include a constant and the following control variables which are not presented to conserve space: EXPENSES, SIZE, CAPITAL, NII, LIQUID, CRISK, GDPGR, INFL, CONC, CRGDP, FINFREE, CORLAW; \*\*\*Statistically significant at the 1% level, \*\*Statistically significant at the 5% level, \*Statistically significant at the 10% level; p-values in parentheses; Variables are defined in Table 1

|              | (1)              | (2)                 | (3)                | (4)                  | (5)                 | (6)               | (7)                 | (8)                  | (9)                  | (10)             | (11)                 | (12)              | (13)              | (14)                 |
|--------------|------------------|---------------------|--------------------|----------------------|---------------------|-------------------|---------------------|----------------------|----------------------|------------------|----------------------|-------------------|-------------------|----------------------|
| LEGALCP2     | 0.034<br>(0.103) |                     |                    |                      |                     |                   |                     |                      |                      |                  |                      |                   |                   |                      |
| FREGUNIT_NO  |                  | -0.001<br>(0.990)   |                    |                      |                     |                   |                     |                      |                      |                  |                      |                   |                   |                      |
| FREGUNIT     |                  | -0.087**<br>(0.050) |                    |                      |                     |                   |                     |                      |                      |                  |                      |                   |                   |                      |
| DISCOPEN     |                  |                     | -0.009*<br>(0.088) |                      |                     |                   |                     |                      |                      |                  |                      |                   |                   |                      |
| DISCPERIOD   |                  |                     |                    | -0.013***<br>(0.000) |                     |                   |                     |                      |                      |                  |                      |                   |                   |                      |
| COMPLAINTS   |                  |                     |                    |                      | -0.023**<br>(0.015) |                   |                     |                      |                      |                  |                      |                   |                   |                      |
| THIRD        |                  |                     |                    |                      |                     | -0.057<br>(0.110) |                     |                      |                      |                  |                      |                   |                   |                      |
| MONITOR      |                  |                     |                    |                      |                     |                   | -0.018**<br>(0.040) |                      |                      |                  |                      |                   |                   |                      |
| ENFPOWER     |                  |                     |                    |                      |                     |                   |                     | -0.041***<br>(0.001) |                      |                  |                      |                   |                   |                      |
| GOPEN        |                  |                     |                    |                      |                     |                   |                     |                      | -0.042***<br>(0.001) |                  |                      |                   |                   |                      |
| DEPOPEN      |                  |                     |                    |                      |                     |                   |                     |                      |                      | 0.006<br>(0.635) |                      |                   |                   |                      |
| CROPEN       |                  |                     |                    |                      |                     |                   |                     |                      |                      |                  | -0.020***<br>(0.005) |                   |                   |                      |
| GPERIOD      |                  |                     |                    |                      |                     |                   |                     |                      |                      |                  |                      | -0.028<br>(0.465) |                   |                      |
| DEPERIOD     |                  |                     |                    |                      |                     |                   |                     |                      |                      |                  |                      |                   | -0.010<br>(0.291) |                      |
| CRPERIOD     |                  |                     |                    |                      |                     |                   |                     |                      |                      |                  |                      |                   |                   | -0.025***<br>(0.000) |
| R-sq overall | 0.263            | 0.260               | 0.262              | 0.261                | 0.261               | 0.265             | 0.263               | 0.265                | 0.263                | 0.262            | 0.261                | 0.262             | 0.262             | 0.263                |
| Obs          | 4,416            | 4,416               | 4,416              | 4,416                | 4,416               | 4,416             | 4,416               | 4,416                | 4,416                | 4,416            | 4,416                | 4,416             | 4,416             | 4,416                |

|           |       |       |       |       |       |       |       |       |       |       |       |       |       |       |
|-----------|-------|-------|-------|-------|-------|-------|-------|-------|-------|-------|-------|-------|-------|-------|
| Banks     | 1,250 | 1,250 | 1,250 | 1,250 | 1,250 | 1,250 | 1,250 | 1,250 | 1,250 | 1,250 | 1,250 | 1,250 | 1,250 | 1,250 |
| Countries | 26    | 26    | 26    | 26    | 26    | 26    | 26    | 26    | 26    | 26    | 26    | 26    | 26    | 26    |

---

## Appendix Table A12 – Regression Results: Developing economies and Sub-indices

This Table presents the results for the sample of developing countries, while using the regulatory sub-indices. Random effects model with errors clustered at the bank level. All the models include a constant and the following control variables which are not presented to conserve space: EXPENSES, SIZE, CAPITAL, NII, LIQUID, CRISK, GDPGR, INFL, CONC, CRGDP, FINFREE, CORLAW; \*\*\*Statistically significant at the 1% level, \*\*Statistically significant at the 5% level, \*Statistically significant at the 10% level; p-values in parentheses; Variables are defined in Table 1

|             | (1)                 | (2)                 | (3)                | (4)               | (5)                 | (6)                | (7)              | (8)                | (9)                | (10)               | (11)               | (12)              | (13)              | (14)   |
|-------------|---------------------|---------------------|--------------------|-------------------|---------------------|--------------------|------------------|--------------------|--------------------|--------------------|--------------------|-------------------|-------------------|--------|
| LEGALCP2    | 0.096***<br>(0.000) |                     |                    |                   |                     |                    |                  |                    |                    |                    |                    |                   |                   |        |
| FREGUNIT_NO |                     | 0.188**<br>(0.025)  |                    |                   |                     |                    |                  |                    |                    |                    |                    |                   |                   |        |
| FREGUNIT    |                     | 0.266***<br>(0.000) |                    |                   |                     |                    |                  |                    |                    |                    |                    |                   |                   |        |
| DISCOPEN    |                     |                     | 0.010**<br>(0.016) |                   |                     |                    |                  |                    |                    |                    |                    |                   |                   |        |
| DISCPERIOD  |                     |                     |                    | -0.004<br>(0.557) |                     |                    |                  |                    |                    |                    |                    |                   |                   |        |
| COMPLAINTS  |                     |                     |                    |                   | 0.130***<br>(0.000) |                    |                  |                    |                    |                    |                    |                   |                   |        |
| THIRD       |                     |                     |                    |                   |                     | 0.102**<br>(0.045) |                  |                    |                    |                    |                    |                   |                   |        |
| MONITOR     |                     |                     |                    |                   |                     |                    | 0.018<br>(0.272) |                    |                    |                    |                    |                   |                   |        |
| ENFPOWER    |                     |                     |                    |                   |                     |                    |                  | 0.035**<br>(0.014) |                    |                    |                    |                   |                   |        |
| GOPEN       |                     |                     |                    |                   |                     |                    |                  |                    | 0.029**<br>(0.028) |                    |                    |                   |                   |        |
| DEPOPEN     |                     |                     |                    |                   |                     |                    |                  |                    |                    | 0.021**<br>(0.047) |                    |                   |                   |        |
| CROPEN      |                     |                     |                    |                   |                     |                    |                  |                    |                    |                    | 0.028**<br>(0.028) |                   |                   |        |
| GPERIOD     |                     |                     |                    |                   |                     |                    |                  |                    |                    |                    |                    | -0.068<br>(0.188) |                   |        |
| DEPERIOD    |                     |                     |                    |                   |                     |                    |                  |                    |                    |                    |                    |                   | -0.014<br>(0.387) |        |
| CRPERIOD    |                     |                     |                    |                   |                     |                    |                  |                    |                    |                    |                    |                   |                   | -0.002 |

(0.809)

---

|              |       |       |       |       |       |       |       |       |       |       |       |       |       |       |
|--------------|-------|-------|-------|-------|-------|-------|-------|-------|-------|-------|-------|-------|-------|-------|
| R-sq overall | 0.344 | 0.346 | 0.343 | 0.345 | 0.345 | 0.343 | 0.344 | 0.344 | 0.343 | 0.343 | 0.343 | 0.345 | 0.345 | 0.345 |
| Obs.         | 6,223 | 6,234 | 6,223 | 6,223 | 6,234 | 6,234 | 6,223 | 6,223 | 6,223 | 6,223 | 6,223 | 6,223 | 6,223 | 6,223 |
| Banks        | 1,763 | 1,766 | 1,763 | 1,763 | 1,766 | 1,766 | 1,763 | 1,763 | 1,763 | 1,763 | 1,763 | 1,763 | 1,763 | 1,763 |
| Countries    | 76    | 77    | 76    | 76    | 77    | 77    | 76    | 76    | 76    | 76    | 76    | 76    | 76    | 76    |

---
